# Supplementary material for: N-Acetyl-L-cysteine Protects Human Retinal Pigment Epithelial Cells from Oxidative Damage: Implications for Age-Related Macular Degeneration
Source: Hindawi journal article supplement (doi:10.1155/2019/5174957), 2019-08-14
Supplement: f1 [file 5174957.f1.pdf]

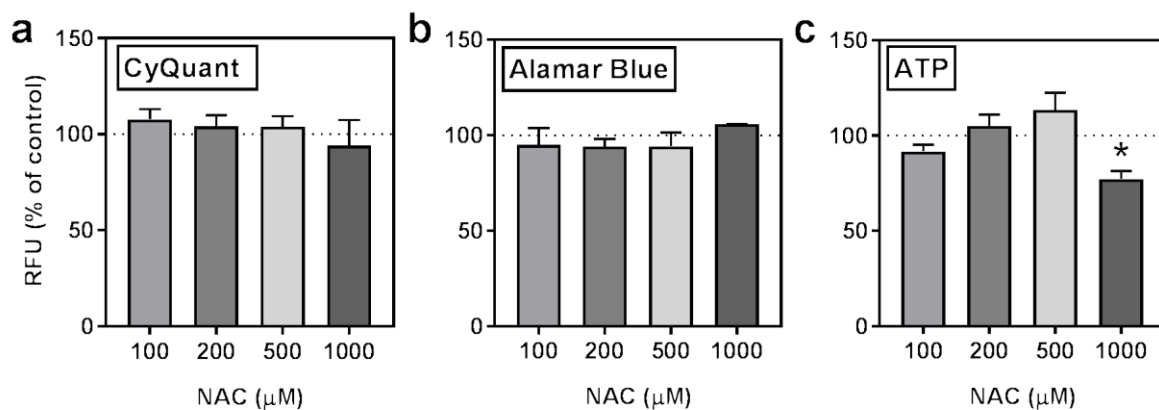

**Supplemental Figure 1: Characterization of NAC treatment effect.** RPE cells from donors without AMD (n = 3) were treated with NAC for 24hrs at a range of concentrations (100-1000μM). Cell viability (**a** and **b**) and ATP content (**c**) are expressed as percentage of no treatment control. Data are mean (± SEM). \* $p < 0.05$  determined by One-Way ANOVA with Dunnett's post hoc.

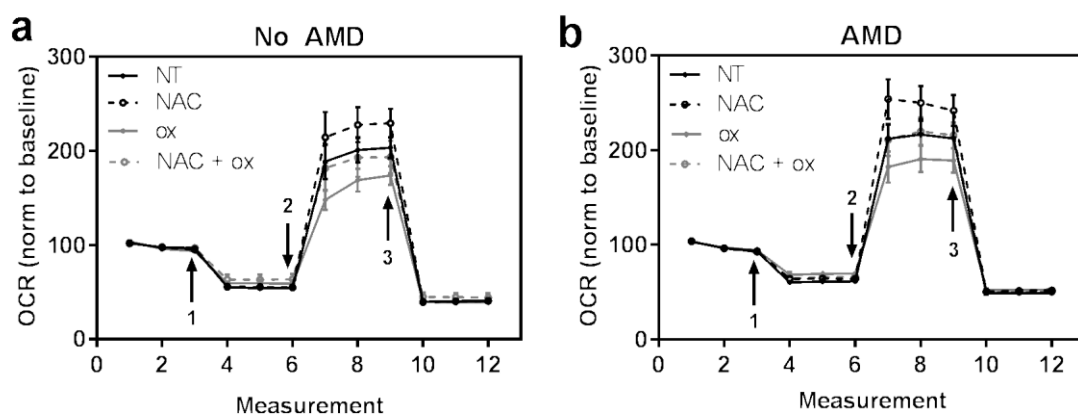

**Supplemental Figure 2: NAC treatment improves mitochondrial function.** Traces from Extracellular Flux Analyzer showing oxygen consumption rate (OCR) normalized to baseline for cells from No AMD (n=6) donors (**a**) and AMD (n=12) donors (**b**) with or without NAC pre-treatment and/or H<sub>2</sub>O<sub>2</sub> (ox) treatment. NT = no treatment. Data are mean (± SEM). Arrows indicate injection of oligomycin (1), FCCP (2), and antimycin A and rotenone (3) to perturb mitochondrial function. Data from these traces were used to calculate the parameters of mitochondrial function found in Figure 6.

**Supplement Table 1. Donor Characteristics and Clinical Information <sup>A</sup>**

| <b>Figure</b> | <b>Disease State<sup>B</sup></b> | <b>Sample (n)</b> | <b>Sex Male (n)</b> | <b>Sex Female (n)</b> | <b>Age <sup>C</sup> (Mean ± SD)</b> |
|---------------|----------------------------------|-------------------|---------------------|-----------------------|-------------------------------------|
| 1a - 1e       | No AMD                           | 7                 | 3                   | 4                     | 66 ± 10.1                           |
|               | AMD                              | 7                 | 5                   | 2                     | 76 ± 6.8                            |
| 1f & 1g       | No AMD                           | 6                 | 5                   | 1                     | 60 ± 9.2                            |
|               | AMD                              | 8                 | 6                   | 2                     | 73 ± 9.1                            |
| 2             | No AMD                           | 5                 | 2                   | 3                     | 69 ± 7.4                            |
|               | AMD                              | 10                | 6                   | 4                     | 75 ± 3.6                            |
| 3             | No AMD                           | 6                 | 2                   | 4                     | 65 ± 8.6                            |
|               | AMD                              | 15                | 10                  | 5                     | 72 ± 10.1                           |
| 4             | No AMD                           | 6                 | 2                   | 4                     | 65 ± 8.7                            |
|               | AMD                              | 12                | 9                   | 3                     | 73 ± 7.7                            |
| 5             | No AMD                           | 6                 | 3                   | 3                     | 67 ± 10.0                           |
|               | AMD                              | 7                 | 5                   | 2                     | 69 ± 15.3                           |
| 6             | No AMD                           | 6                 | 4                   | 2                     | 59 ± 8.8                            |
|               | AMD                              | 11                | 7                   | 4                     | 70 ± 15.4                           |

<sup>A</sup>  
Information supplied by Lions Gift of Sight (St. Paul, MN).

<sup>B</sup>  
Minnesota Grading System (MGS) was used to evaluate the stage of AMD in eye bank eyes (Olsen and Feng, 2004). No AMD = MGS1; AMD = MGS2, 3, or 4.

<sup>C</sup>  
There was no statistically significant difference in age between No AMD and AMD donors as determined by t-test comparison for donors used in each figure.
